# Supplementary material for: Optimization of Ethanol Extraction Technology for Yujin Powder Using Response Surface Methodology with a Box–Behnken Design Based on Analytic Hierarchy Process–Criteria Importance through Intercriteria Correlation Weight Analysis and Its Safety Evaluation
Source: MDPI journal article supplement (doi:10.3390/molecules28248124), 2023-12-15
Supplement: s1 [file s1]

**Table S1. 14** Objective pairwise comparison judgment priority matrix

| Nemb                       | Germacrone | Berberine<br>hydrochloride | Baicalin | Baicalein | Wogonosid<br>e | Wogonin | Geniposide | chebulinic<br>acid | Paeoniflorin | Emodin | Gallic<br>acid | Chrysophanol | Berberine | Yield of dry<br>extract |
|----------------------------|------------|----------------------------|----------|-----------|----------------|---------|------------|--------------------|--------------|--------|----------------|--------------|-----------|-------------------------|
| Germacrone                 | 1          | 2                          | 2        | 2         | 2              | 2       | 2          | 3                  | 3            | 3      | 3              | 3            | 3         | 4                       |
| Berberine<br>hydrochloride | 1/2        | 1                          | 1        | 1         | 1              | 1       | 1          | 2                  | 2            | 2      | 2              | 2            | 2         | 3                       |
| Baicalin                   | 1/2        | 1                          | 1        | 1         | 1              | 1       | 1          | 2                  | 2            | 2      | 2              | 2            | 2         | 3                       |
| Baicalein                  | 1/2        | 1                          | 1        | 1         | 1              | 1       | 1          | 2                  | 2            | 2      | 2              | 2            | 2         | 3                       |
| Wogonoside                 | 1/2        | 1                          | 1        | 1         | 1              | 1       | 1          | 2                  | 2            | 2      | 2              | 2            | 2         | 3                       |
| Wogonin                    | 1/2        | 1                          | 1        | 1         | 1              | 1       | 1          | 2                  | 2            | 2      | 2              | 2            | 2         | 3                       |
| Geniposide                 | 1/2        | 1                          | 1        | 1         | 1              | 1       | 1          | 2                  | 2            | 2      | 2              | 2            | 2         | 3                       |
| chebulinic acid            | 1/3        | 1/2                        | 1/2      | 1/2       | 1/2            | 1/2     | 1/2        | 1                  | 1            | 1      | 1              | 1            | 1         | 2                       |
| Paeoniflorin               | 1/3        | 1/2                        | 1/2      | 1/2       | 1/2            | 1/2     | 1/2        | 1                  | 1            | 1      | 1              | 1            | 1         | 2                       |
| Emodin                     | 1/3        | 1/2                        | 1/2      | 1/2       | 1/2            | 1/2     | 1/2        | 1                  | 1            | 1      | 1              | 1            | 1         | 2                       |
| Gallic acid                | 1/3        | 1/2                        | 1/2      | 1/2       | 1/2            | 1/2     | 1/2        | 1                  | 1            | 1      | 1              | 1            | 1         | 2                       |
| Chrysophanol               | 1/3        | 1/2                        | 1/2      | 1/2       | 1/2            | 1/2     | 1/2        | 1                  | 1            | 1      | 1              | 1            | 1         | 2                       |
| Berberine                  | 1/3        | 1/2                        | 1/2      | 1/2       | 1/2            | 1/2     | 1/2        | 1                  | 1            | 1      | 1              | 1            | 1         | 2                       |
| Yield of dry extract       | 1/4        | 1/3                        | 1/3      | 1/3       | 1/3            | 1/3     | 1/3        | 1/2                | 1/2          | 1/2    | 1/2            | 1/2          | 1/2       | 1                       |
