# Supplementary material for: Optimization of Ethanol Extraction Technology for Yujin Powder Using Response Surface Methodology with a Box–Behnken Design Based on Analytic Hierarchy Process–Criteria Importance through Intercriteria Correlation Weight Analysis and Its Safety Evaluation
Source: MDPI journal article supplement (doi:10.3390/molecules28248124), 2023-12-15
Supplement: s1 [file s1]

**Table S2.** Contents of 13 components (mg/g) and dry extract (%) in single factor samples

| Nemb                      | Germacrone | Gallic acid | Geniposide | Paeoniflorin | Chebulinic acid | Coptisine hydrochloride | Baicalin | Berberine | Wogonoside | Baicalein | Wogonin | Emodin | Chrysophanol | Yield of dry extract |
|---------------------------|------------|-------------|------------|--------------|-----------------|-------------------------|----------|-----------|------------|-----------|---------|--------|--------------|----------------------|
| Ethanol concentration 50% | 2.0087     | 11.2327     | 26.5897    | 74.9702      | 22.4385         | 2.8795                  | 15.7169  | 66.6675   | 3.6774     | 4.5143    | 2.9926  | 1.6823 | 22.1451      | 40.9                 |
| Ethanol concentration 60% | 4.0295     | 17.2852     | 41.3008    | 159.7721     | 27.8918         | 2.8001                  | 14.3643  | 34.8702   | 4.4738     | 4.0268    | 2.3792  | 2.3959 | 23.4405      | 26.85                |
| Ethanol concentration 70% | 5.7887     | 13.3970     | 45.1618    | 128.2105     | 21.6098         | 3.7348                  | 13.4250  | 32.5532   | 26.7480    | 1.3260    | 2.4717  | 3.0118 | 29.3518      | 28.19                |
| Ethanol concentration 80% | 3.9806     | 13.2441     | 34.7898    | 108.7280     | 21.5611         | 3.4890                  | 11.2888  | 33.9374   | 3.6881     | 1.9777    | 2.4471  | 2.5619 | 26.7725      | 29.46                |
| Reflux temperature 40 °C  | 3.4157     | 7.3506      | 18.5352    | 48.4917      | 21.8474         | 5.8382                  | 12.9634  | 55.1385   | 3.2453     | 7.4717    | 3.3815  | 1.8103 | 16.7667      | 23.26                |
| Reflux temperature 50 °C  | 5.7137     | 7.3139      | 21.9865    | 59.2071      | 22.5603         | 6.0375                  | 15.4378  | 65.3865   | 4.0131     | 8.6450    | 3.3943  | 1.8154 | 18.2819      | 35.49                |
| Reflux temperature 60 °C  | 6.7145     | 8.2004      | 19.9603    | 55.1335      | 28.5620         | 7.0264                  | 21.9377  | 72.3804   | 5.2881     | 9.6080    | 3.7103  | 2.3160 | 19.8155      | 33.51                |
| Reflux temperature 70 °C  | 5.5917     | 7.6257      | 18.9632    | 51.0067      | 27.6846         | 5.8924                  | 11.4927  | 65.3091   | 5.2666     | 9.2300    | 3.0999  | 1.9016 | 17.8657      | 31.88                |
| Reflux time 40 min        | 0.6331     | 6.8493      | 17.4379    | 58.8529      | 23.0539         | 6.0550                  | 15.2821  | 71.5981   | 4.1702     | 9.5105    | 3.5784  | 1.7115 | 17.2695      | 35.31                |
| Reflux time 50 min        | 12.9389    | 7.4851      | 20.7890    | 67.7794      | 25.9481         | 7.5779                  | 17.9980  | 77.8741   | 5.2666     | 11.7393   | 3.6719  | 2.1411 | 21.0527      | 32.79                |
| Reflux time 60 min        | 1.5188     | 9.2642      | 17.7794    | 63.5287      | 23.8216         | 7.8681                  | 24.3691  | 85.6418   | 5.5881     | 13.8619   | 3.8442  | 2.4238 | 23.1575      | 32.15                |

|                             |        |         |         |          |         |         |         |          |        |         |        |        |         |       |
|-----------------------------|--------|---------|---------|----------|---------|---------|---------|----------|--------|---------|--------|--------|---------|-------|
| Reflux time 70 min          | 4.3276 | 6.6537  | 15.8989 | 52.2111  | 21.5793 | 5.8943  | 16.4952 | 70.6266  | 4.5524 | 13.1504 | 3.4337 | 1.8078 | 21.7871 | 36.93 |
| Ultrasonic intensity 40 KHZ | 1.9442 | 11.0677 | 33.7927 | 60.6240  | 23.9069 | 2.6724  | 15.0352 | 69.9001  | 3.0739 | 10.5744 | 3.8698 | 1.8065 | 15.1298 | 32.19 |
| Ultrasonic intensity 50 KHZ | 2.1552 | 10.3585 | 33.4649 | 85.7564  | 27.2703 | 7.8140  | 17.1983 | 83.4065  | 7.0737 | 10.2118 | 3.3224 | 2.2793 | 18.2003 | 21.6  |
| Ultrasonic intensity 60 KHZ | 5.4225 | 6.7026  | 17.7339 | 57.4005  | 23.2245 | 5.9640  | 17.6169 | 62.2914  | 4.2631 | 9.4370  | 3.5183 | 2.2159 | 22.1767 | 23.74 |
| Ultrasonic intensity 70 KHZ | 4.7600 | 7.0144  | 11.0408 | 48.9522  | 22.1947 | 5.3254  | 17.2198 | 54.7559  | 4.1881 | 8.7049  | 3.5124 | 2.2007 | 20.7280 | 22.83 |
| Liquid-material ratio 15:1  | 0.3489 | 4.6301  | 14.1688 | 43.6920  | 19.8672 | 4.0560  | 12.3086 | 46.2230  | 4.0952 | 7.1672  | 3.3539 | 2.0423 | 21.6272 | 36.45 |
| Liquid-material ratio 20:1  | 2.4202 | 5.7733  | 17.7794 | 58.8529  | 24.2116 | 6.1285  | 22.6033 | 66.8222  | 5.4059 | 8.1866  | 3.5429 | 2.2996 | 24.1399 | 34.93 |
| Liquid-material ratio 25:1  | 6.4913 | 10.7987 | 22.2733 | 131.0974 | 48.9008 | 12.8297 | 37.9808 | 138.0770 | 7.4201 | 19.0138 | 5.1616 | 2.2565 | 21.9985 | 33.45 |
| Liquid-material ratio 30:1  | 2.1796 | 7.5768  | 19.6188 | 79.9117  | 36.3064 | 6.3472  | 29.5862 | 101.0440 | 6.0773 | 11.3134 | 3.9515 | 2.2438 | 21.9219 | 32.18 |
