# Supplementary material for: Optimization of Ethanol Extraction Technology for Yujin Powder Using Response Surface Methodology with a Box–Behnken Design Based on Analytic Hierarchy Process–Criteria Importance through Intercriteria Correlation Weight Analysis and Its Safety Evaluation
Source: MDPI journal article supplement (doi:10.3390/molecules28248124), 2023-12-15
Supplement: s1 [file s1]

Table S3. correlation matrix

| Nemb                    | Germacrone | Gallic acid | Geniposide | Paeoniflorin | Chebulinic acid | Coptisine hydrochloride | Baicalin | Berberine | Wogonoside | Baicalein | Wogonin | Emodin | Chrysophanol | Yield of dry extract |
|-------------------------|------------|-------------|------------|--------------|-----------------|-------------------------|----------|-----------|------------|-----------|---------|--------|--------------|----------------------|
| Germacrone              | 1.0000     | 0.0371      | 0.0284     | 0.1251       | 0.2202          | 0.3246                  | 0.1035   | 0.0989    | 0.1791     | 0.1505    | 0.0885  | 0.2024 | 0.1195       | 0.0985               |
| Gallic acid             | 0.0371     | 1.0000      | 0.8886     | 0.8723       | 0.1665          | 0.2884                  | 0.0768   | 0.2356    | 0.3273     | 0.4004    | 0.4319  | 0.4597 | 0.3842       | 0.2121               |
| Geniposide              | 0.0284     | 0.8886      | 1.0000     | 0.7809       | 0.0037          | 0.3904                  | 0.2406   | 0.3476    | 0.5265     | 0.5286    | 0.5279  | 0.4960 | 0.3653       | 0.2178               |
| Paeoniflorin            | 0.1251     | 0.8723      | 0.7809     | 1.0000       | 0.4401          | 0.0197                  | 0.1939   | 0.0516    | 0.4466     | 0.2564    | 0.2499  | 0.5931 | 0.5487       | 0.1989               |
| chebulinic acid         | 0.2202     | 0.1665      | 0.0037     | 0.4401       | 1.0000          | 0.7126                  | 0.8427   | 0.8003    | 0.0271     | 0.6132    | 0.6643  | 0.1345 | 0.0232       | 0.0376               |
| Coptisine hydrochloride | 0.3246     | 0.2884      | 0.3904     | 0.0197       | 0.7126          | 1.0000                  | 0.7711   | 0.8358    | 0.0240     | 0.8192    | 0.7859  | 0.0511 | 0.1301       | 0.0269               |
| Baicalin                | 0.1035     | 0.0768      | 0.2406     | 0.1939       | 0.8427          | 0.7711                  | 1.0000   | 0.8672    | 0.0067     | 0.7261    | 0.8086  | 0.1719 | 0.0918       | 0.1464               |
| Berberine               | 0.0989     | 0.2356      | 0.3476     | 0.0516       | 0.8003          | 0.8358                  | 0.8672   | 1.0000    | 0.1728     | 0.8907    | 0.9026  | 0.1986 | 0.2916       | 0.2215               |
| Wogonoside              | 0.1791     | 0.3273      | 0.5265     | 0.4466       | 0.0271          | 0.0240                  | 0.0067   | 0.1728    | 1.0000     | 0.2975    | 0.2467  | 0.6826 | 0.5806       | 0.1468               |
| Baicalein               | 0.1505     | 0.4004      | 0.5286     | 0.2564       | 0.6132          | 0.8192                  | 0.7261   | 0.8907    | 0.2975     | 1.0000    | 0.9141  | 0.2831 | 0.4048       | 0.1500               |
| Wogonin                 | 0.0885     | 0.4319      | 0.5279     | 0.2499       | 0.6643          | 0.7859                  | 0.8086   | 0.9026    | 0.2467     | 0.9141    | 1.0000  | 0.2537 | 0.3794       | 0.1873               |
| Emodin                  | 0.2024     | 0.4597      | 0.4960     | 0.5931       | 0.1345          | 0.0511                  | 0.1719   | 0.1986    | 0.6826     | 0.2831    | 0.2537  | 1.0000 | 0.7841       | 0.3940               |
| Chrysophanol            | 0.1195     | 0.3842      | 0.3653     | 0.5487       | 0.0232          | 0.1301                  | 0.0918   | 0.2916    | 0.5806     | 0.4048    | 0.3794  | 0.7841 | 1.0000       | 0.0187               |
| Yield of dry extract    | 0.0985     | 0.2121      | 0.2178     | 0.1989       | 0.0376          | 0.0269                  | 0.1464   | 0.2215    | 0.1468     | 0.1500    | 0.1873  | 0.3940 | 0.0187       | 1.0000               |
