# Supplementary material for: Optimization of Ethanol Extraction Technology for Yujin Powder Using Response Surface Methodology with a Box–Behnken Design Based on Analytic Hierarchy Process–Criteria Importance through Intercriteria Correlation Weight Analysis and Its Safety Evaluation
Source: MDPI journal article supplement (doi:10.3390/molecules28248124), 2023-12-15
Supplement: s1 [file s1]

**Table S4.** Calculation results of CRITIC of each indicator

| Nemb                    | Contrast strength $\delta_j$ | Conflict $R_{ij}$ | Comprehensive Weight $C_i$ | Weight $W_i$ |
|-------------------------|------------------------------|-------------------|----------------------------|--------------|
| Germacrone              | 0.225                        | 11.421            | 2.575                      | 0.0711       |
| Gallic acid             | 0.244                        | 11.509            | 2.812                      | 0.0776       |
| Geniposide              | 0.273                        | 12.164            | 3.320                      | 0.0916       |
| Paeoniflorin            | 0.284                        | 9.776             | 2.777                      | 0.0767       |
| chebulinic acid         | 0.227                        | 8.361             | 1.897                      | 0.0524       |
| Coptisine hydrochloride | 0.229                        | 9.579             | 2.198                      | 0.0607       |
| Baicalin                | 0.246                        | 8.588             | 2.116                      | 0.0584       |
| Berberine               | 0.229                        | 9.681             | 2.214                      | 0.0611       |
| Wogonoside              | 0.213                        | 11.111            | 2.369                      | 0.0654       |
| Baicalein               | 0.231                        | 10.907            | 2.524                      | 0.0697       |
| Wogonin                 | 0.220                        | 10.738            | 2.364                      | 0.0653       |
| Emodin                  | 0.249                        | 10.554            | 2.632                      | 0.0726       |
| Chrysophanol            | 0.240                        | 11.336            | 2.720                      | 0.0751       |
| Yield of dry extract    | 0.274                        | 13.534            | 3.710                      | 0.1024       |
